# Supplementary material for: Economic burden of excess weight among older adults in Singapore: a cross-sectional study
Source: PubMed Central journal article supplement — BMJ Open. 2022 Sep 15;12(9):e064357. doi: 10.1136/bmjopen-2022-064357 (PMC9486358; doi:10.1136/bmjopen-2022-064357), 2022-09-15
Supplement: bmjopen-2022-064357supp001.pdf [file bmjopen-2022-064357supp001.pdf]

Appendix Table 1. Non-subsidized unit costs of healthcare services

| Category                        | Unit Cost (S\$) | Details                                                                                                                                                                                                      | Source(s)                                                                                                                                                                                                                                                                                                                                                                                                                                                                                                                                                                                                                                                                                                         |
|---------------------------------|-----------------|--------------------------------------------------------------------------------------------------------------------------------------------------------------------------------------------------------------|-------------------------------------------------------------------------------------------------------------------------------------------------------------------------------------------------------------------------------------------------------------------------------------------------------------------------------------------------------------------------------------------------------------------------------------------------------------------------------------------------------------------------------------------------------------------------------------------------------------------------------------------------------------------------------------------------------------------|
| Inpatient admission             | S\$4,503.70     | Fees for hospitalization for Ward A (non-subsidized ward) in SGH, TTSH, NUH. The average of median bill sizes divided by average days hospitalized results in the average bill size per hospitalization day. | 1. Singapore General Hospital - \$5123.27<br>2. Tan Tock Seng Hospital - \$3887.90<br>3. National University Hospital - \$4499.94<br>Historical transacted bill information for July 2018 – June 2019 ( <a href="https://www.moh.gov.sg/cost-financing/fee-benchmarks-and-bill-amount-information">https://www.moh.gov.sg/cost-financing/fee-benchmarks-and-bill-amount-information</a> )                                                                                                                                                                                                                                                                                                                         |
| Emergency Department (ED) Visit | S\$123.33       | Average of non-subsidised prices for ED visits at 3 major public hospitals                                                                                                                                   | 1. Singapore General Hospital: \$121 ( <a href="https://www.sgh.com.sg/patient-care/visiting-specialist/charges-payments-singapore-general-hospital">https://www.sgh.com.sg/patient-care/visiting-specialist/charges-payments-singapore-general-hospital</a> )<br>2. Tan Tock Seng Hospital: \$128 and- ( <a href="https://www.ttsh.com.sg/Patients-Visitors/Your-Clinic-Visit/Pages/Outpatient-Charges.aspx">https://www.ttsh.com.sg/Patients-Visitors/Your-Clinic-Visit/Pages/Outpatient-Charges.aspx</a> )<br>3. National University Hospital: \$121 ( <a href="https://www.nuh.com.sg/patients-visitors/Pages/Charges-Payment.aspx">https://www.nuh.com.sg/patients-visitors/Pages/Charges-Payment.aspx</a> ) |
| Outpatient Visit                | S\$51.48        | Average of non-resident price for General Practitioner visits at polyclinics run by 3 major public healthcare institutions                                                                                   | 1. SingHealth clinics: \$51.50 for non-resident ( <a href="https://polyclinic.singhealth.com.sg/Pages/FeesAndPayment.aspx">https://polyclinic.singhealth.com.sg/Pages/FeesAndPayment.aspx</a> )<br>2. National Healthcare Group: \$51.47 for non-resident ( <a href="https://www.nhgp.com.sg/charges_and_payment/">https://www.nhgp.com.sg/charges_and_payment/</a> )<br>3. NUHS polyclinics: \$51.47 for non-resident ( <a href="https://www.nup.com.sg/Pages/Fees%20and%20Charges/bbk.aspx">https://www.nup.com.sg/Pages/Fees%20and%20Charges/bbk.aspx</a> )                                                                                                                                                    |
