# Supplementary material for: Economic burden of excess weight among older adults in Singapore: a cross-sectional study
Source: PubMed Central journal article supplement — BMJ Open. 2022 Sep 15;12(9):e064357. doi: 10.1136/bmjopen-2022-064357 (PMC9486358; doi:10.1136/bmjopen-2022-064357), 2022-09-15
Supplement: bmjopen-2022-064357supp002.pdf [file bmjopen-2022-064357supp002.pdf]

Appendix Table 2. Distribution of obesity across ethnic groups using Asian BMI cut-offs

| <b>BMI range<br/>(kg/m<sup>2</sup>)</b> | <b>WHO<br/>classification for<br/>general population</b> | <b>WHO<br/>classification for<br/>Asian population</b> | <b>Chinese<br/>n = 2,467<br/>%</b> | <b>Indian<br/>n = 2,128<br/>%</b> | <b>Malay<br/>n = 1,253<br/>%</b> | <b>P-value<sup>a</sup></b> |
|-----------------------------------------|----------------------------------------------------------|--------------------------------------------------------|------------------------------------|-----------------------------------|----------------------------------|----------------------------|
| 18.5 – 23.0                             | Normal                                                   | Normal                                                 | 41.5%                              | 20.8%                             | 18.1%                            | <0.001                     |
| 23.0 – 25.0                             |                                                          | Overweight                                             | 23.2%                              | 19.4%                             | 15.8%                            |                            |
| 25.0 – 29.9                             | Overweight                                               | Obese I                                                | 29.2%                              | 40.9%                             | 40.8%                            |                            |
| ≥30                                     | Obese                                                    | Obese II                                               | 6.1%                               | 18.9%                             | 25.3%                            |                            |

a: Chi-square Test for whether the distribution of Normal and Overweight categories using Asian BMI cut-offs are different by ethnic groups
