# Supplementary material for: Economic burden of excess weight among older adults in Singapore: a cross-sectional study
Source: PubMed Central journal article supplement — BMJ Open. 2022 Sep 15;12(9):e064357. doi: 10.1136/bmjopen-2022-064357 (PMC9486358; doi:10.1136/bmjopen-2022-064357), 2022-09-15
Supplement: bmjopen-2022-064357supp003.pdf [file bmjopen-2022-064357supp003.pdf]

Appendix Table 3. Incremental Medical Expenditures and Productivity Losses Attributable to Excess weight using Asian BMI cut-offs.

|                                                                                                                                                                                                                                                                                          | Medical expenditure,<br>S\$ (95% CI) | Absenteeism days<br>(95% CI) <sup>^</sup> | Absenteeism cost,<br>S\$ (95% CI) <sup>^</sup> |
|------------------------------------------------------------------------------------------------------------------------------------------------------------------------------------------------------------------------------------------------------------------------------------------|--------------------------------------|-------------------------------------------|------------------------------------------------|
| <b>Chinese</b>                                                                                                                                                                                                                                                                           |                                      |                                           |                                                |
| Normal (ref)                                                                                                                                                                                                                                                                             | -                                    | -                                         | -                                              |
| Overweight                                                                                                                                                                                                                                                                               | -68 (-275,138)                       | 0.9* (-0.1,2.0)                           | 196** (7,384)                                  |
| Obese I                                                                                                                                                                                                                                                                                  | 30 (-191,251)                        | 1.4*** (0.4,2.3)                          | 220** (51,390)                                 |
| Obese II                                                                                                                                                                                                                                                                                 | 711** (66,1358)                      | 2.0 (-0.8,4.8)                            | 380 (-199,960)                                 |
| Number of observations                                                                                                                                                                                                                                                                   | 2,427                                | 1,335                                     | 1,335                                          |
| <b>Indian</b>                                                                                                                                                                                                                                                                            |                                      |                                           |                                                |
| Normal (ref)                                                                                                                                                                                                                                                                             | -                                    | -                                         | -                                              |
| Overweight                                                                                                                                                                                                                                                                               | -229 (-619,160)                      | -1.0 (-2.9,0.8)                           | -136 (-350,79)                                 |
| Obese I                                                                                                                                                                                                                                                                                  | -98 (-442,246)                       | -0.1 (-2.0,1.8)                           | -50 (-265,165)                                 |
| Obese II                                                                                                                                                                                                                                                                                 | -98 (-516,321)                       | 1.3 (-1.3,4.0)                            | 238 (-135,612)                                 |
| Number of observations                                                                                                                                                                                                                                                                   | 2,107                                | 1,166                                     | 1,166                                          |
| <b>Malay</b>                                                                                                                                                                                                                                                                             |                                      |                                           |                                                |
| Normal (ref)                                                                                                                                                                                                                                                                             | -                                    | -                                         | -                                              |
| Overweight                                                                                                                                                                                                                                                                               | 386 (-303,1075)                      | -2.2 (-4.9,0.5)                           | -326 (-848,197)                                |
| Obese I                                                                                                                                                                                                                                                                                  | 293 (-270,857)                       | -0.5 (-3.3,2.3)                           | -67 (-626,493)                                 |
| Obese II                                                                                                                                                                                                                                                                                 | 518 (-99,1135)                       | -0.5 (-3.4,2.5)                           | -63 (-575,449)                                 |
| Number of observations                                                                                                                                                                                                                                                                   | 1,225                                | 515                                       | 515                                            |
| CI, confidence interval; Reference category is Normal, 18.5 – 22.9 kg/m <sup>2</sup> ; Overweight, 23.0 – 24.9 BMI; Obese I, 25.0 – 29.9 kg/m <sup>2</sup> ; Obese II, ≥30.0 kg/m <sup>2</sup> ; <sup>^</sup> Among employed workers only; * $p < 0.10$ , ** $p < 0.05$ , *** $p < 0.01$ |                                      |                                           |                                                |
