# Supplementary material for: Economic burden of excess weight among older adults in Singapore: a cross-sectional study
Source: PubMed Central journal article supplement — BMJ Open. 2022 Sep 15;12(9):e064357. doi: 10.1136/bmjopen-2022-064357 (PMC9486358; doi:10.1136/bmjopen-2022-064357), 2022-09-15
Supplement: bmjopen-2022-064357supp004.pdf [file bmjopen-2022-064357supp004.pdf]

Appendix Table 4. Aggregate Medical Expenditures and Productivity Losses Attributable to Excess weight using Asian BMI cut-offs.

|                          | Number of residents with excess weight | Medical expenditure, S\$ million (95% CI) | Absenteeism cost, S\$ million (95% CI) <sup>^</sup> | Total cost, S\$ million (95% CI) <sup>†</sup> |
|--------------------------|----------------------------------------|-------------------------------------------|-----------------------------------------------------|-----------------------------------------------|
| <b>Chinese</b>           |                                        |                                           |                                                     |                                               |
| Overweight               | 352,107                                | -22 (-97, 53)                             | 51** (2, 101)                                       | 14 (-79, 106)                                 |
| Obese I                  | 443,828                                | 12 (-88, 112)                             | 70** (16, 124)                                      | 65 (-52, 183)                                 |
| Obese II                 | 92,336                                 | 63** (5, 121)                             | 24 (-12, 60)                                        | 81** (5, 156)                                 |
| Excess weight            | 888,271                                | 53 (-114, 220)                            | 145*** (57, 233)                                    | 159 (-36, 354)                                |
| <b>Indian</b>            |                                        |                                           |                                                     |                                               |
| Overweight               | 32,333                                 | -8 (-21, 4)                               | -3 (-8, 2)                                          | -9 (-23, 4)                                   |
| Obese I                  | 68,354                                 | -7 (-31, 16)                              | -3 (-14, 8)                                         | -7 (-33, 18)                                  |
| Obese II                 | 31,626                                 | -3 (-16, 10)                              | 5 (-3, 12)                                          | 2 (-14, 18)                                   |
| Excess weight            | 132,313                                | -19 (-60, 23)                             | -1 (-20, 18)                                        | -15 (-62, 32)                                 |
| <b>Malay</b>             |                                        |                                           |                                                     |                                               |
| Overweight               | 34,874                                 | 14 (-12, 39)                              | -8 (-21, 5)                                         | 12 (-15, 38)                                  |
| Obese I                  | 90,002                                 | 24 (-26, 74)                              | -5 (-43, 34)                                        | 27 (-30, 83)                                  |
| Obese II                 | 55,833                                 | 28* (-5, 61)                              | -2 (-21, 16)                                        | 32 (-6, 70)                                   |
| Excess weight            | 180,709                                | 65 (-26, 157)                             | -15 (-79, 50)                                       | 71 (-32, 174)                                 |
| <b>Total<sup>#</sup></b> |                                        |                                           |                                                     |                                               |
| Overweight               | 419,314                                | -28 (-127, 71)                            | 49* (-7, 105)                                       | 12 (-104, 128)                                |
| Obese I                  | 602,184                                | 23 (-125, 170)                            | 102*** (32, 1733)                                   | 100 (-66, 265)                                |
| Obese II                 | 179,796                                | 106** (23, 188)                           | 45** (6, 85)                                        | 139*** (39, 240)                              |
| Excess weight            | 1,201,293                              | 148 (-114, 410)                           | 208*** (96, 320)                                    | 306** (14, 598)                               |

CI, confidence interval; Reference category is Normal, 18.5 – 24.9 kg/m<sup>2</sup>; Overweight, 25.0 – 29.9 kg/m<sup>2</sup>; Obese, 30.0+ kg/m<sup>2</sup>;

<sup>#</sup> Weighted by population proportion;

<sup>^</sup> Among employed workers only

<sup>†</sup> Absenteeism cost is assigned as 0 for non-working individuals; \*  $p < 0.10$ , \*\*  $p < 0.05$ , \*\*\*  $p < 0.01$
