# Supplementary material for: Economic burden of excess weight among older adults in Singapore: a cross-sectional study
Source: PubMed Central journal article supplement — BMJ Open. 2022 Sep 15;12(9):e064357. doi: 10.1136/bmjopen-2022-064357 (PMC9486358; doi:10.1136/bmjopen-2022-064357), 2022-09-15
Supplement: bmjopen-2022-064357supp005.pdf [file bmjopen-2022-064357supp005.pdf]

Appendix Table 5. Rates of comorbidities among Chinese, Indians and Malays across BMI categories.

| BMI range<br>(kg/m <sup>2</sup> ) | WHO<br>classification<br>for general<br>population | WHO<br>classification<br>for Asian<br>population | Chinese<br>n= 2,467 |                      | Indian<br>n= 2,128 |                      | Malay<br>n= 1,253 |                      |
|-----------------------------------|----------------------------------------------------|--------------------------------------------------|---------------------|----------------------|--------------------|----------------------|-------------------|----------------------|
|                                   |                                                    |                                                  | %                   | P-value <sup>a</sup> | %                  | P-value <sup>a</sup> | %                 | P-value <sup>a</sup> |
| <b>Diabetes</b>                   |                                                    |                                                  |                     |                      |                    |                      |                   |                      |
| 18.5 – 23.0                       | Normal                                             | Normal                                           | 9.7%                | 0.003                | 33.0%              | 0.505                | 23.8%             | 0.038                |
| 23.0 – 25.0                       |                                                    | Overweight                                       | 14.7%               |                      | 35.2%              |                      | 32.8%             |                      |
| 25.0 – 29.9                       | Overweight                                         | Obese I                                          | 20.4%               |                      | 36.7%              |                      | 34.8%             |                      |
| ≥30                               | Obese                                              | Obese II                                         | 29.3%               |                      | 42.9%              |                      | 38.5%             |                      |
| <b>Hypertension</b>               |                                                    |                                                  |                     |                      |                    |                      |                   |                      |
| 18.5 – 23.0                       | Normal                                             | Normal                                           | 35.8%               | 0.002                | 42.8%              | 0.730                | 48.9%             | 0.395                |
| 23.0 – 25.0                       |                                                    | Overweight                                       | 43.9%               |                      | 43.9%              |                      | 53%               |                      |
| 25.0 – 29.9                       | Overweight                                         | Obese I                                          | 57.6%               |                      | 47.6%              |                      | 59.7%             |                      |
| ≥30                               | Obese                                              | Obese II                                         | 68.7%               |                      | 59.8%              |                      | 69.7%             |                      |
| <b>High Cholesterol</b>           |                                                    |                                                  |                     |                      |                    |                      |                   |                      |
| 18.5 – 23.0                       | Normal                                             | Normal                                           | 38.9%               | 0.001                | 50.0%              | 0.777                | 47.6%             | 0.064                |
| 23.0 – 25.0                       |                                                    | Overweight                                       | 47.4%               |                      | 51.0%              |                      | 56.6%             |                      |
| 25.0 – 29.9                       | Overweight                                         | Obese I                                          | 56.7%               |                      | 52.6%              |                      | 62.2%             |                      |
| ≥30                               | Obese                                              | Obese II                                         | 58.7%               |                      | 64.8%              |                      | 68.8%             |                      |

a: Chi-square Test between proportion of Normal (18.5 – 23.0) and Overweight (23.0 – 25.0) who have the comorbidities (diabetes, hypertension and cholesterol)
