# Supplementary material for: Economic burden of excess weight among older adults in Singapore: a cross-sectional study
Source: PubMed Central journal article supplement — BMJ Open. 2022 Sep 15;12(9):e064357. doi: 10.1136/bmjopen-2022-064357 (PMC9486358; doi:10.1136/bmjopen-2022-064357), 2022-09-15
Supplement: bmjopen-2022-064357supp006.pdf [file bmjopen-2022-064357supp006.pdf]

Supplementary Method. Total aggregate burden prediction using Weighted regression methodology.

We ran weighted regressions to account for disproportionate number of Indian and Malay participants in the pooled data. A probability weight was assigned to each ethnic group, calculated as the ratio of the population proportion of each ethnic group over the sample proportion (**Table A**). Calculations for per capita burden and aggregate burden are based on these weight regression coefficient estimates.

**Table A. Racial weight for overall regressions.**

| <b>Ethnicity</b> | <b>Population proportion (excluding Other ethnic groups)</b> | <b>Sample proportion</b> | <b>Probability Weight</b> |
|------------------|--------------------------------------------------------------|--------------------------|---------------------------|
| Chinese          | 79.7%                                                        | 42.2%                    | 1.89                      |
| Indian           | 8.8%                                                         | 36.4%                    | 0.24                      |
| Malay            | 11.6%                                                        | 21.4%                    | 0.54                      |
